# Supplementary material for: Using genetic variants to evaluate the causal effect of cholesterol lowering on head and neck cancer risk: A Mendelian randomization study
Source: PLOS journal article supplement (doi:10.1371/journal.pgen.1009525), 2021-04-22

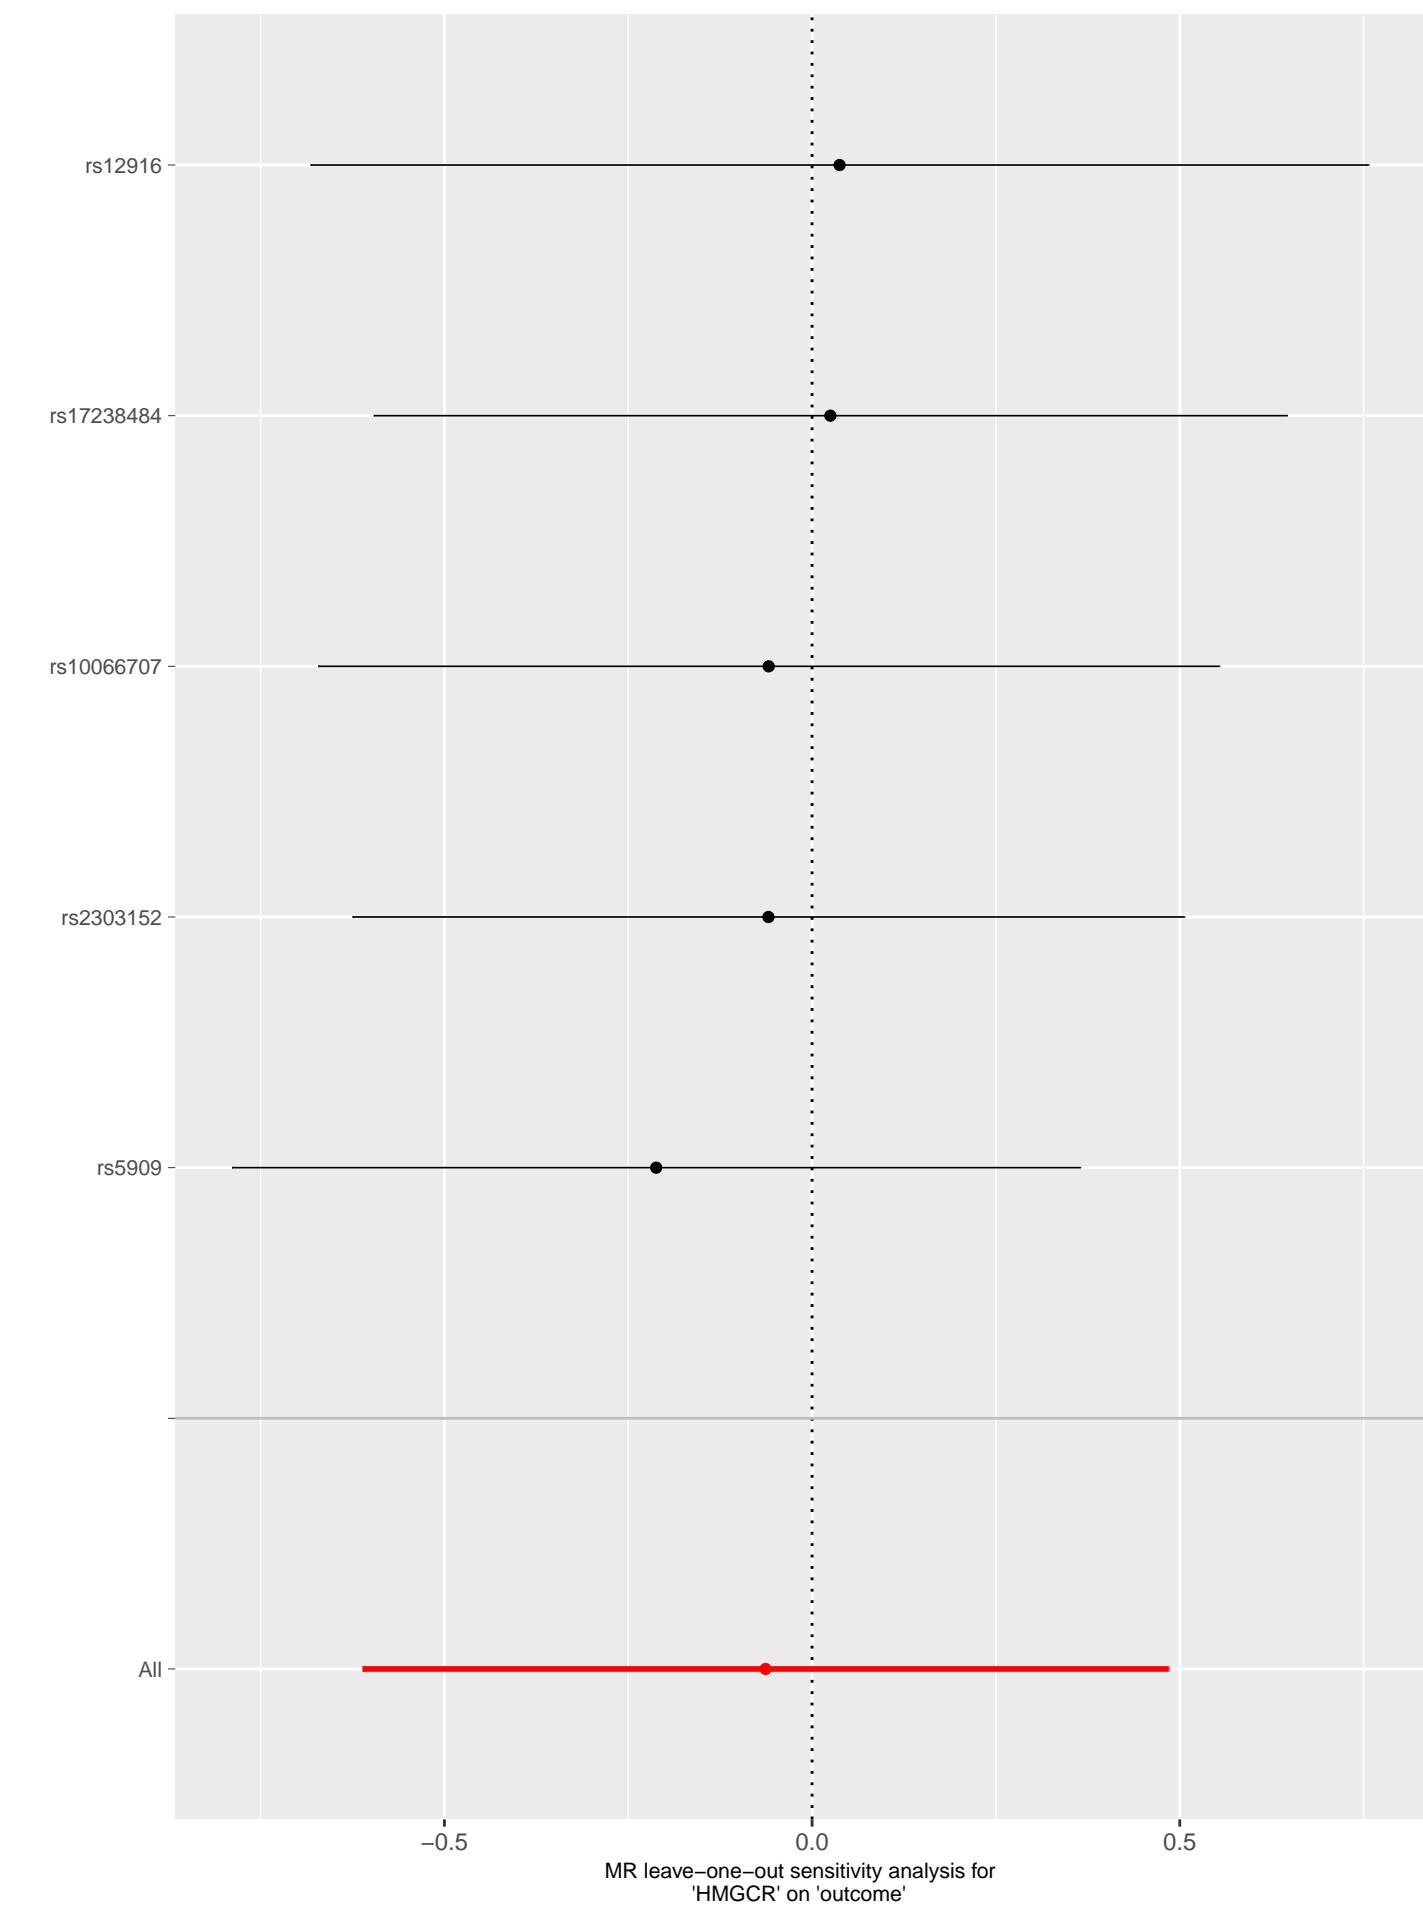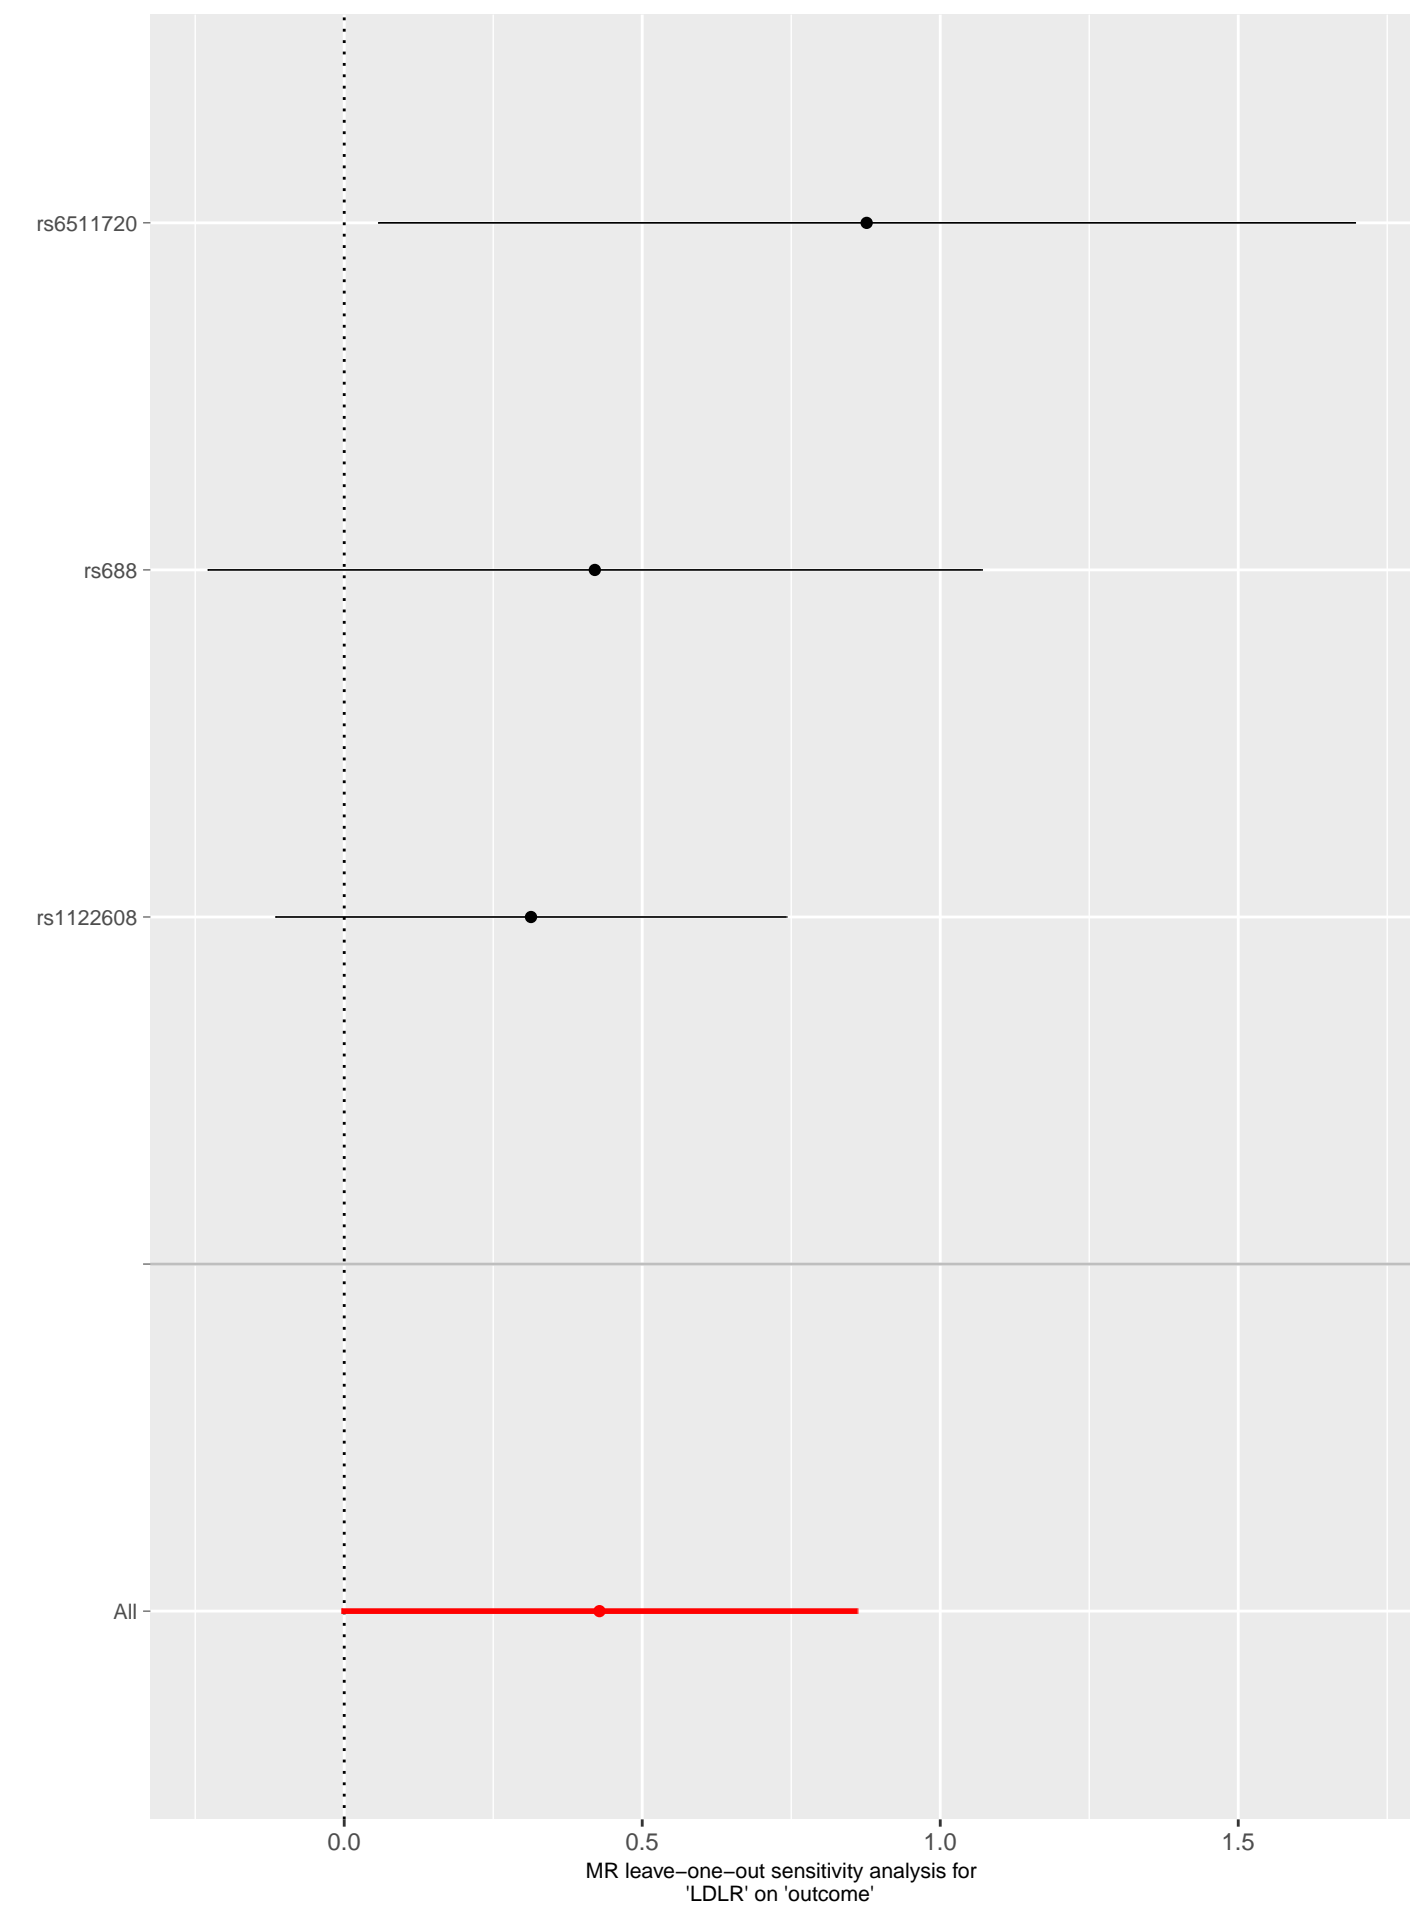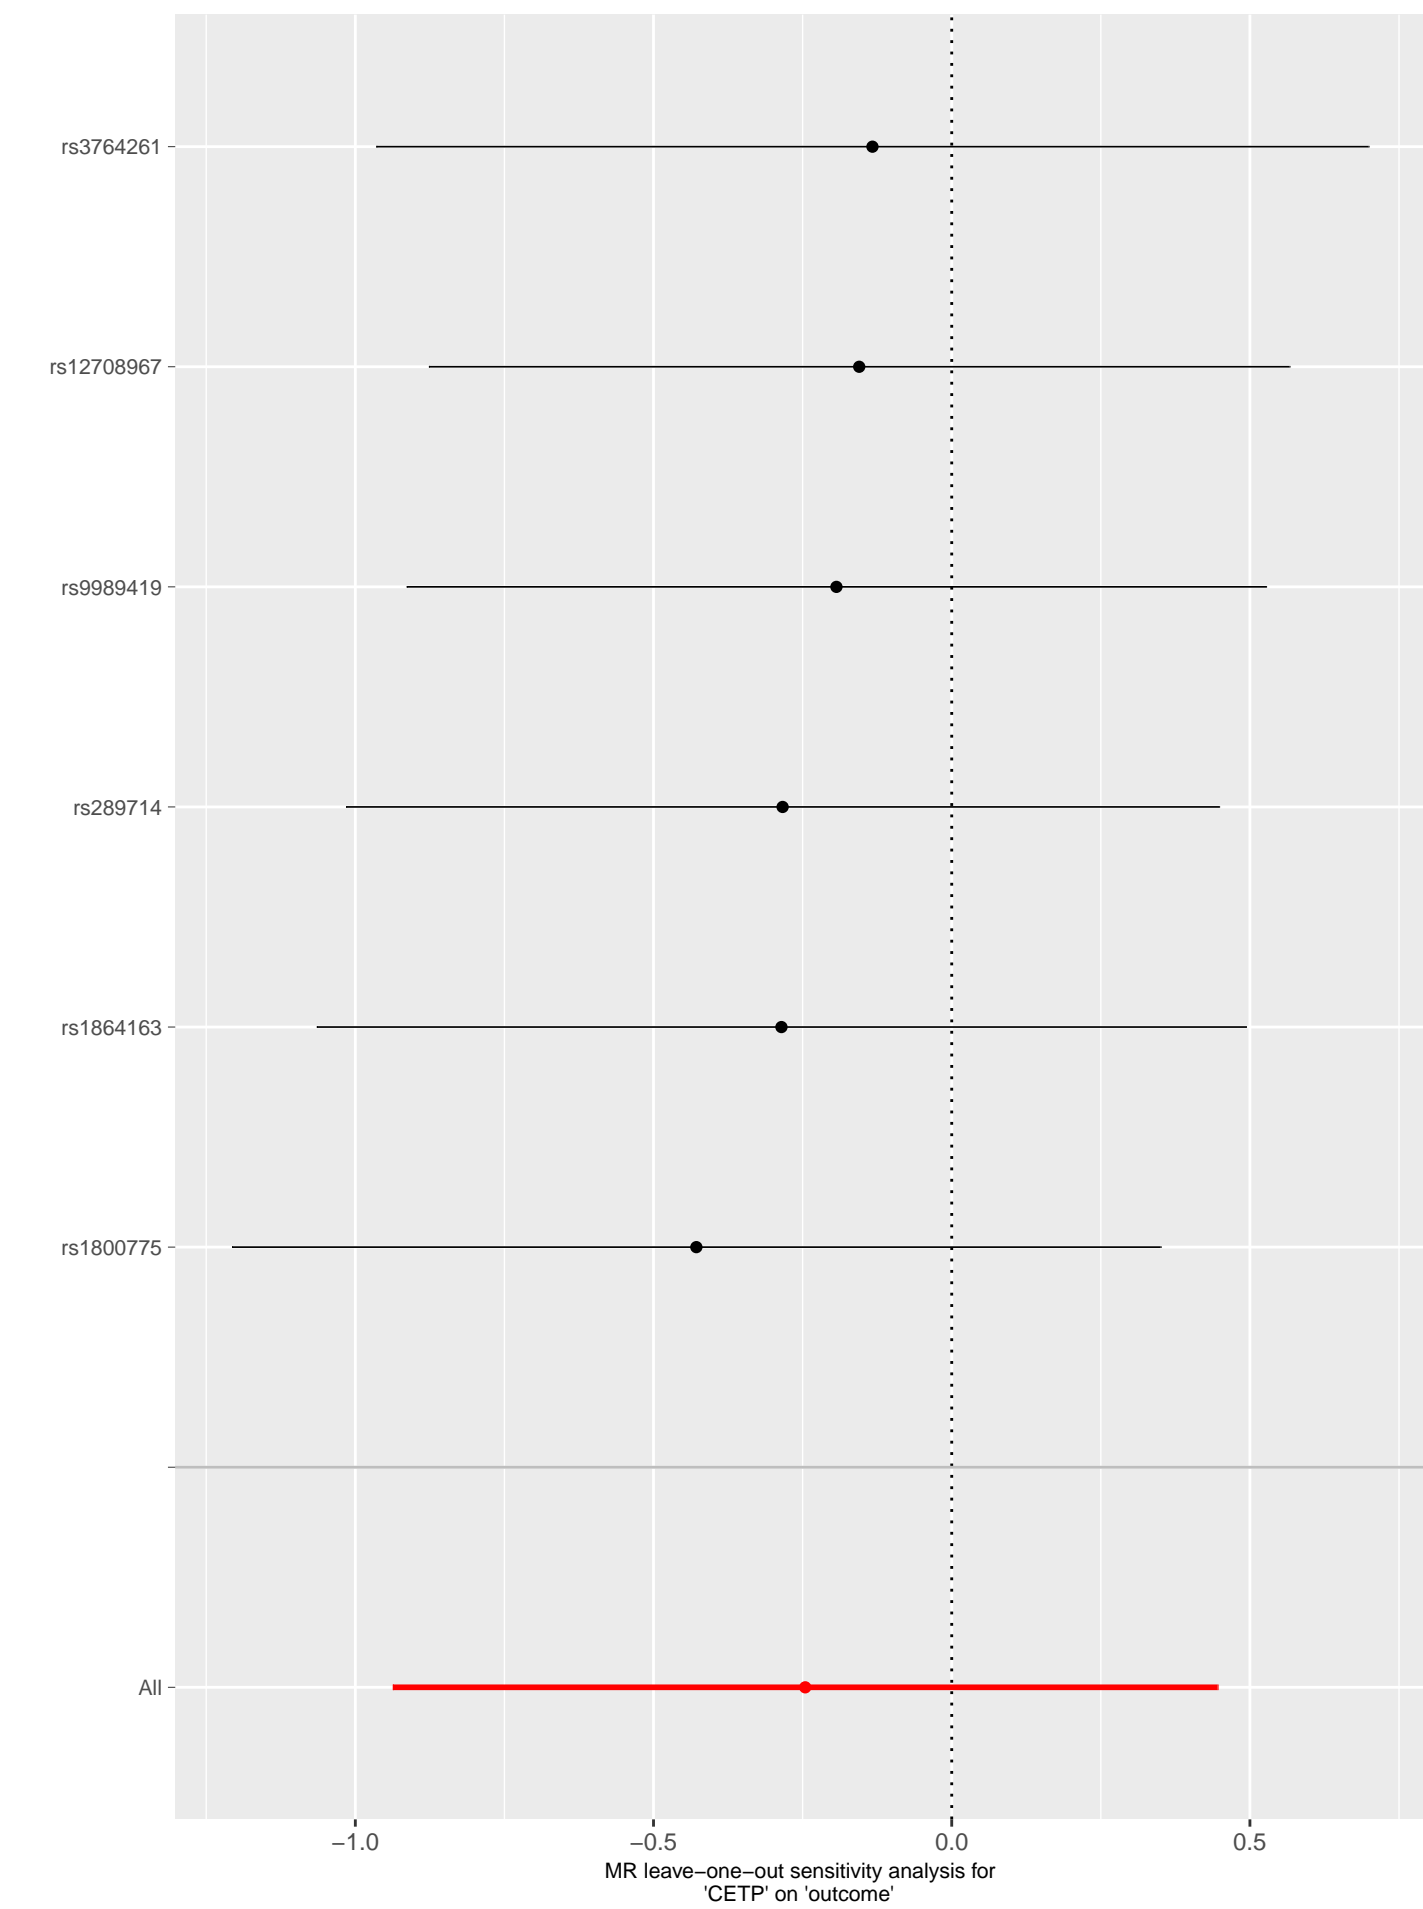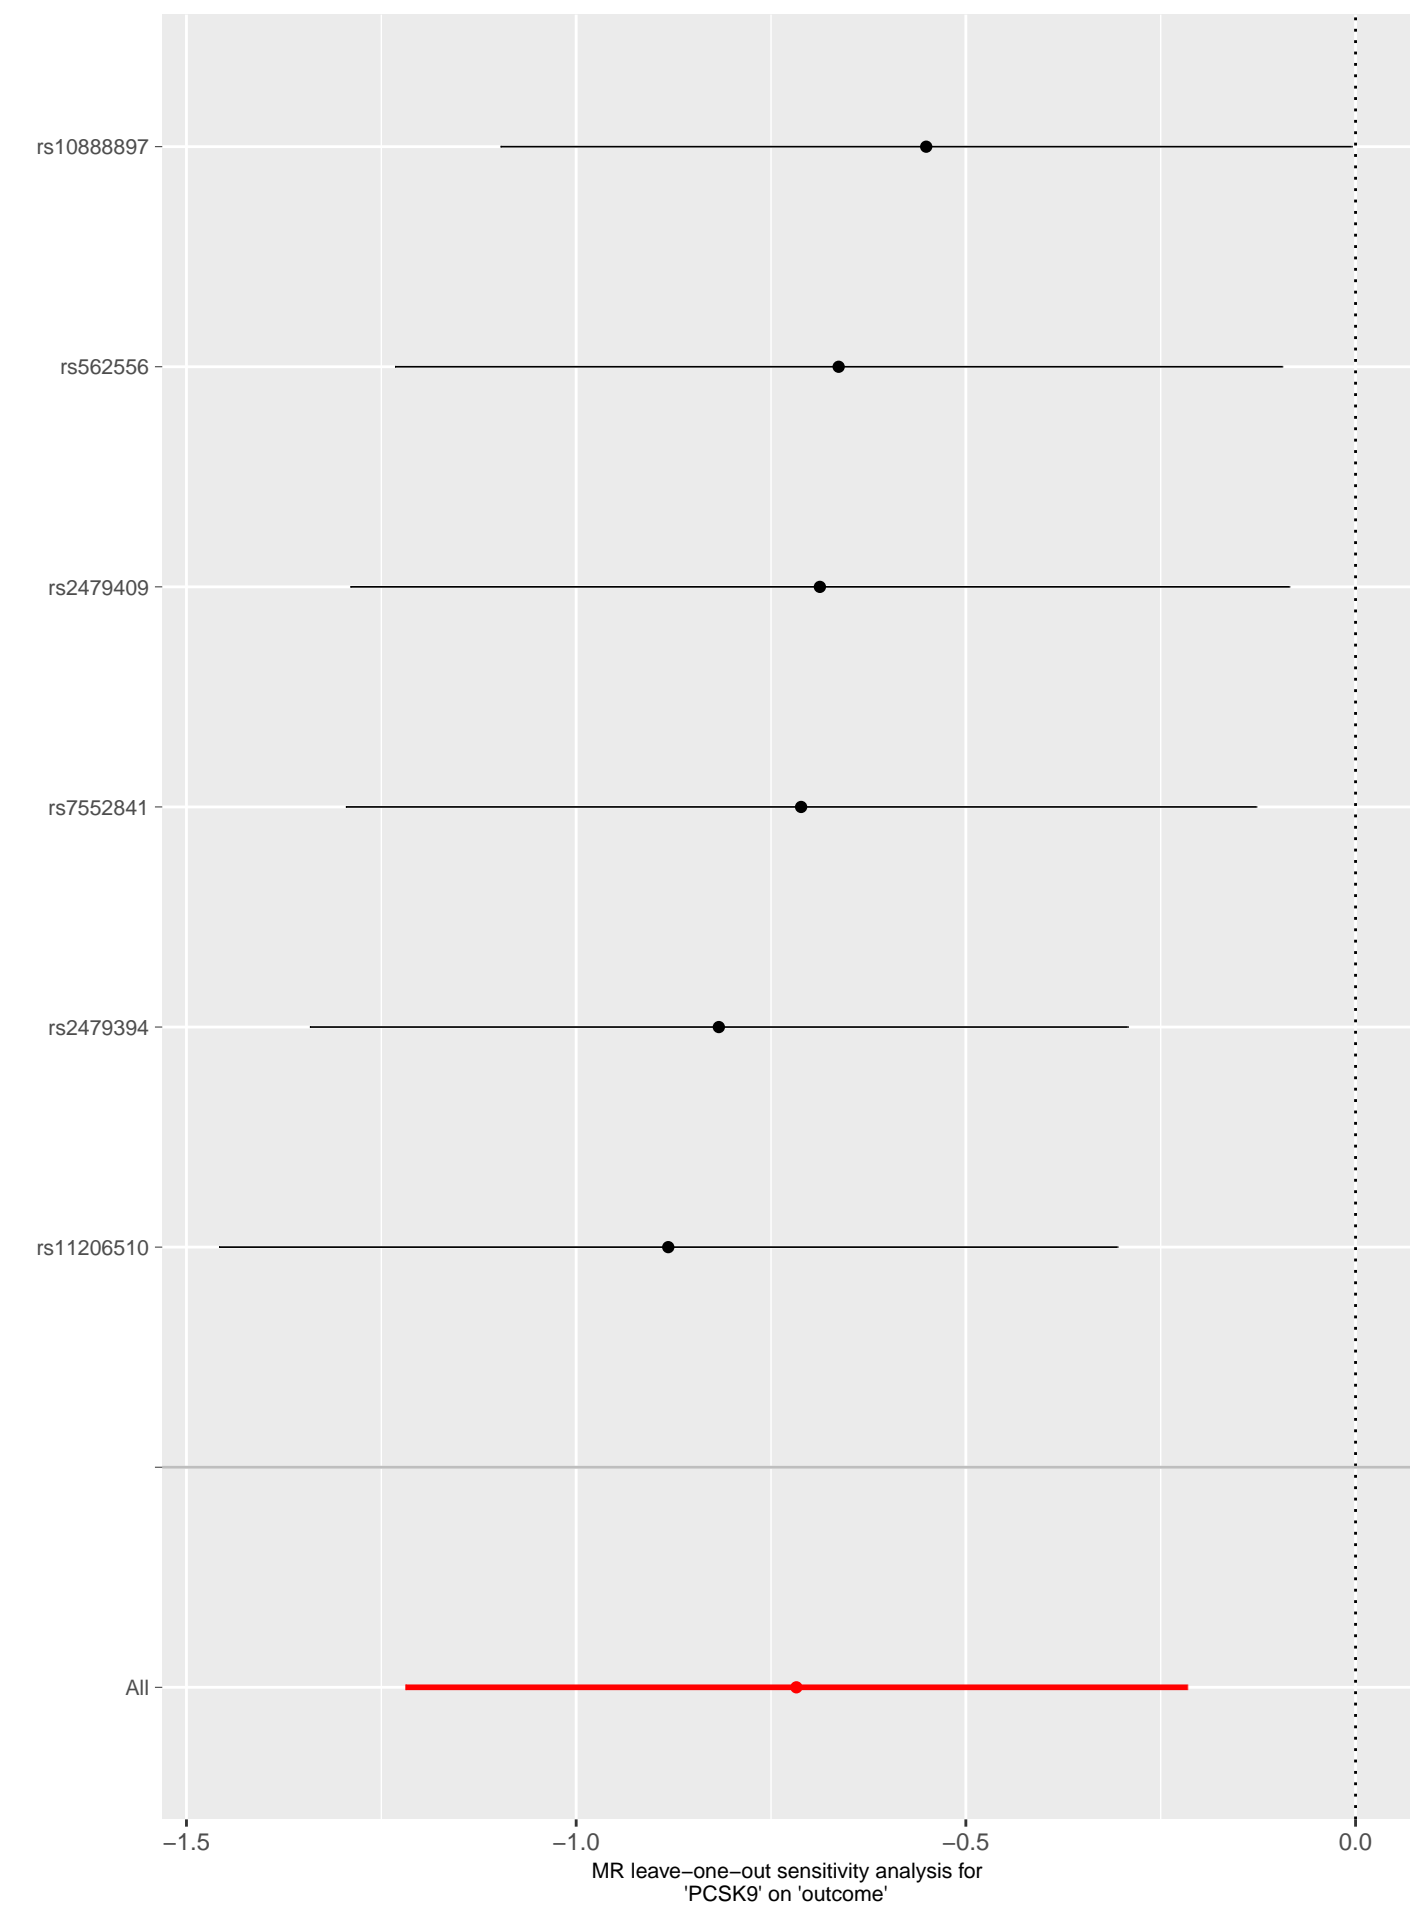

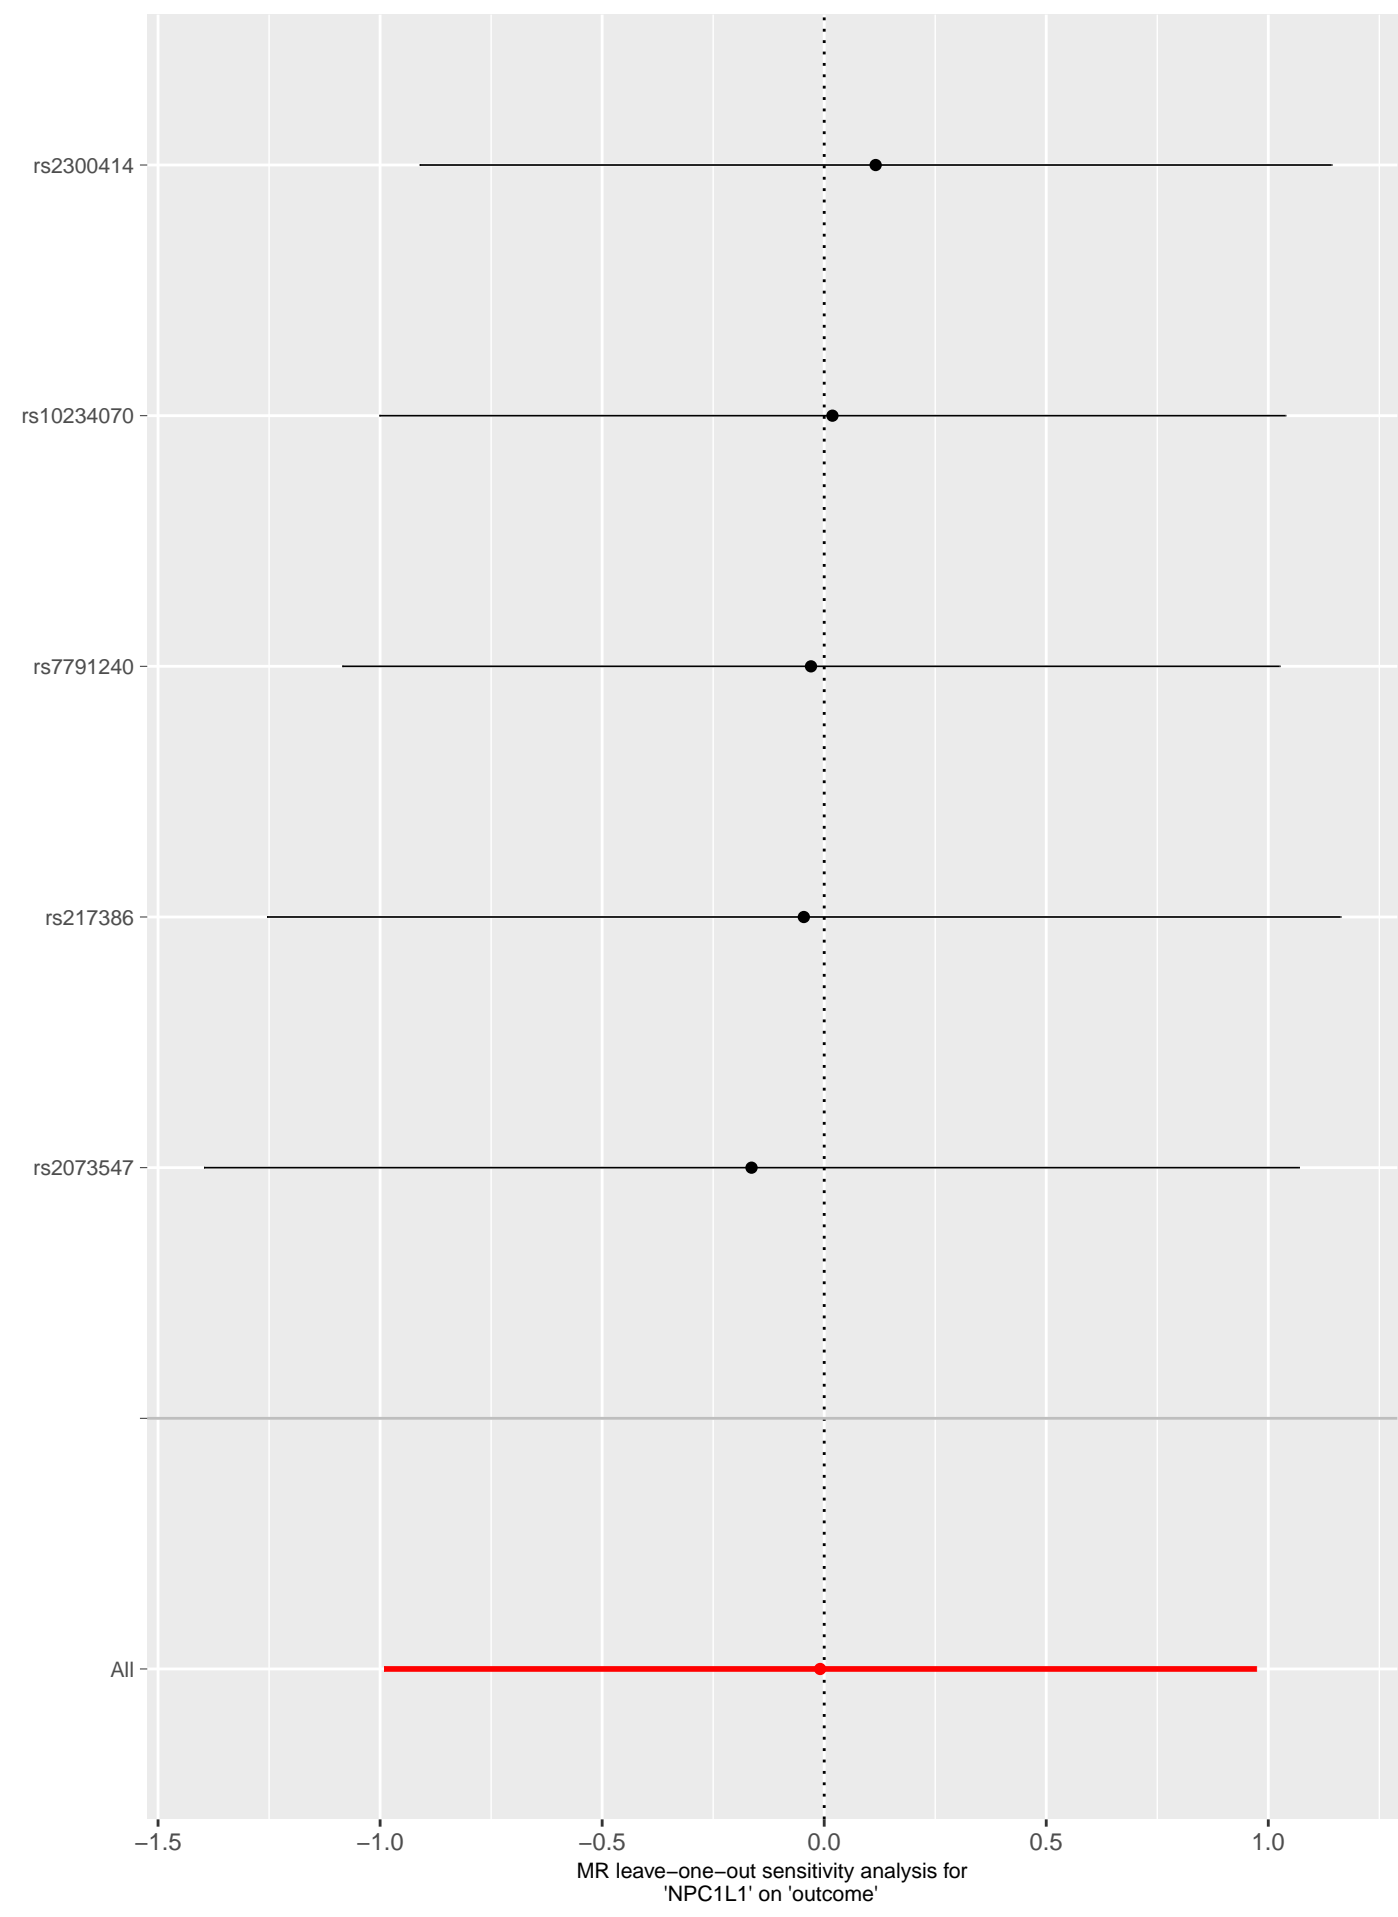

Supplement: S18 (10.1371/journal.pgen.1009525.s018) [file journal.pgen.1009525.s018]
